# Supplementary material
Source: Springer Nature journal article supplement (https://www.springermedizin.de/resource/supplementary/12931_2013_1383_MOESM8_ESM.pdf/9426148)

## A. mRNA

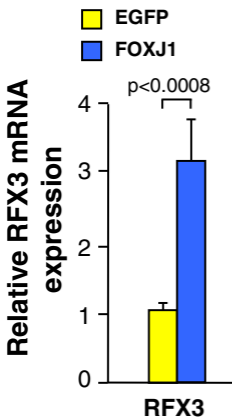

## B. Promoter activity

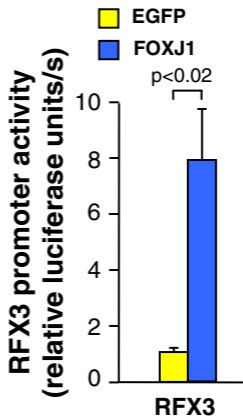

## C. mRNA

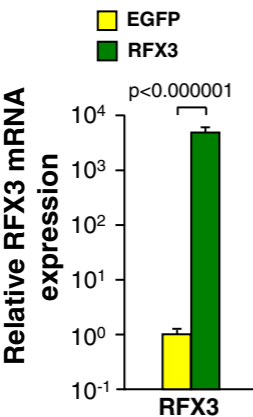

## D. Protein

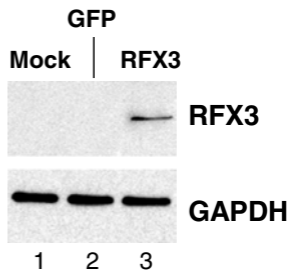

Supplement: MOESM8 [file 9426148]
